# Supplementary material for: T-RFPred: a nucleotide sequence size prediction tool for microbial community description based on terminal-restriction fragment length polymorphism chromatograms
Source: PubMed Central journal article supplement (PMC2965158; doi:10.1186/1471-2180-10-262), 2010-10-15
Supplement: 1471-2180-10-262-S1.pdf [file 1471-2180-10-262-S1.pdf]

## **Additional Information**

T-RFPred can be downloaded from <http://sourceforge.net/projects/t-rfpred/files/>

## **Experimental Procedures**

T-RFLP chromatograms

To test the method, chromatogram peaks from marine samples were taxonomically identified using datasets of bacterioplankton 16S rRNA sequences from GenBank. The origin of the DNA samples, PCR conditions and T-RFLP analysis are described in detail in González et al. (2000). These T-RFLP profiles were generated using the primers 8F-FAM (5'-AGAGTTTGATCCTGGCTCAG; PE Corporation) and 1522R (5'-AAGGAGGTGATCCANCCRCA). The restriction enzymes used were *AluI*, *HaeIII* and *CfoI* (Boehringer Mannheim). 16S rRNA sequences were retrieved from GenBank by searching for strings as described in Hagström et al. (2002). Since many more sequences have been submitted since that publication, these search limits did not guarantee that all recovered sequences are derived from bacterioplankton samples. Thus, a script was written to cluster sequences with the same GenBank source field and those sequences were manually inspected to remove any that were not of marine origin. Sequences < 1000 bp in length were also removed. This left a total of 4926 sequences for further analysis, hereafter referred to as the “4926 dataset”. Another set of sequences consisted of the 16S rRNA sequences > 1000 bp from the Global Ocean Sampling Expedition Microbial Metagenome (6370 sequences; designated the “GOS dataset”; Rusch et al., 2007). Due to the large size of these datasets, custom scripts were written to facilitate the taxonomic identification of the chromatogram peaks.

From these two datasets, subsets of sequences were extracted that would yield a fragment peak of a certain size on the chromatogram within a 5-10 nucleotide window

and for a given restriction enzyme. This window size was chosen because of the experimental error associated to the estimation of the fragment size (see main text). These subsets were then further analyzed to determine the expected fragment sizes for the other two restriction enzymes. Sequences whose expected sizes matched the chromatogram peaks were finally used to provide a taxonomic label for the peaks. The phylogenetic placement of the sequences used to label the peaks was determined using T-RFPred, RDP Classifier (Wang et al., 2007), as well as a local BLAST to the sequences from the type strains of reference bacterial species (Yarza et al., 2008).

**Supplementary Table S1.** Comparison between the phylogenetic affiliations described in González et al. (2000) and the predictions obtained by T-RFPred. eFL: predicted fragment length (bp).

| González et al. 2000 |                         |                          |                | T-RFPred prediction          |     |                |                                                                                                  |
|----------------------|-------------------------|--------------------------|----------------|------------------------------|-----|----------------|--------------------------------------------------------------------------------------------------|
| Clone acc. number    | Closest hit acc. number | Group                    | Similarity (%) | Closest hit accession number | eFL | Similarity (%) | RDP Taxonomy                                                                                     |
| AF245657             | U75257                  | SAR11                    | 96             | AB193906                     | 906 | 97.6           | Root;Bacteria;Proteobacteria;Alphaproteobacteria;unclassified_Alphaproteobacteria.               |
| AF245656             | U75257                  | SAR11                    | 94.6           | EU801410                     | 906 | 96.4           | Root;Bacteria;Proteobacteria;Alphaproteobacteria;Rhizobiales;unclassified_Rhizobiales.           |
| AF245655             | L10935                  | SAR11                    | 93.1           | AB193894                     | 908 | 98.4           | Root;Bacteria;Proteobacteria;Alphaproteobacteria;unclassified_Alphaproteobacteria.               |
| AF245654             | AF104473                | $\alpha$ -Proteobacteria | 91.9           | FJ202874                     | 94  | 95.7           | Root;Bacteria;Proteobacteria;Alphaproteobacteria;Rhodospirillales;unclassified_Rhodospirillales. |
| AF245653             | U75257                  | SAR11                    | 95.1           | FJ545621                     | 908 | 95.7           | Root;Bacteria;Proteobacteria;Alphaproteobacteria;unclassified_Alphaproteobacteria.               |
| AF245651             | U70691                  | SAR11                    | 99             | DQ906730                     | 907 | 99.1           | Root;Bacteria;Proteobacteria;Alphaproteobacteria;unclassified_Alphaproteobacteria.               |
| AF245650             | AJ227814                | $\alpha$ -Proteobacteria | 99.3           | AF082799                     | 503 | 99.3           | Root;Bacteria;Proteobacteria;Alphaproteobacteria;Rhodobacterales;Rhodobacteraceae;Hyphomonas.    |

|          |          |                          |      |          |      |      |                                                                                                                |
|----------|----------|--------------------------|------|----------|------|------|----------------------------------------------------------------------------------------------------------------|
| AF245649 | AF141501 | $\gamma$ -Proteobacteria | 98.9 | DQ396337 | 1119 | 98.7 | Root;Bacteria;Proteobacteria;Gammaproteobacteria;unclassified_Gammaproteobacteria.                             |
| AF245648 | X52172   | SAR11                    | 95.1 | EF573350 | 182  | 97.1 | Root;Bacteria;Proteobacteria;Alphaproteobacteria;unclassified_Alphaproteobacteria.                             |
| AF245647 | X82139   | $\gamma$ -Proteobacteria | 99.8 | FJ695595 | 364  | 99.5 | Root;Bacteria;Proteobacteria;Gammaproteobacteria;Alteromonadales;Pseudoalteromonadaceae;Pseudoalteromonas.     |
| AF245646 | L35504   | $\delta$ -Proteobacteria | 89.1 | DQ396207 | 95   | 95.1 | Root;Bacteria;Proteobacteria;Deltaproteobacteria;Desulfobacterales;Nitrospinaeae;Nitrospina.                   |
| AF245645 | EU805021 | Cytophagales             | 97.7 | EU805021 | 90   | 97.7 | Root;Bacteria;Bacteroidetes;Sphingobacteria;Sphingobacteriales;Flexibacteraceae;unclassified_Flexibacteraceae. |
| AF245644 | AF141439 | $\gamma$ -Proteobacteria | 91.4 | AY942761 | 226  | 95.2 | Root;Bacteria;Proteobacteria;Gammaproteobacteria;Oceanospirillales;unclassified_Oceanospirillales.             |
| AF245643 | AF141586 | $\gamma$ -Proteobacteria | 95.8 | FJ826169 | 60   | 94.0 | Root;Bacteria;Proteobacteria;Gammaproteobacteria;unclassified_Gammaproteobacteria.                             |
| AF245642 | AF001650 | SAR86                    | 99.8 | FJ545592 | 362  | 99.5 | Root;Bacteria;Proteobacteria;Gammaproteobacteria;unclassified_Gammaproteobacteria.                             |
| AF245641 | AF001638 | $\alpha$ -Proteobacteria | 100  | AY627381 | 82   | 99.5 | Root;Bacteria;Proteobacteria;Alphaproteobacteria;unclassified_Alphaproteobacteria.                             |
| AF245640 | AF001651 | SAR86                    | 99.8 | EU799743 | 565  | 99.8 | Root;Bacteria;Proteobacteria;Gammaproteobacteria;unclassified_Gammaproteobacteria.                             |
| AF245639 | D30791   | $\alpha$ -Proteobacteria | 91.5 | FJ826369 | 182  | 98.2 | Root;Bacteria;Proteobacteria;Alphaproteobacteria;unclassified_Alphaproteobacteria.                             |

|          |          |                    |      |          |     |      |                                                                                                                  |
|----------|----------|--------------------|------|----------|-----|------|------------------------------------------------------------------------------------------------------------------|
| AF245638 | U70684   | SAR11              | 99.8 | FJ825912 | 901 | 99.6 | Root;Bacteria;Proteobacteria;unclassified_Proteobacteria.                                                        |
| AF245637 | AJ002563 | <i>Roseobacter</i> | 100  | EU800060 | 60  | 100  | Root;Bacteria;Proteobacteria;Alphaproteobacteria;Rhodobacterales;Rhodobacteraceae;unclassified_Rhodobacteraceae. |
| AF245636 | AF001650 | SAR86              | 98.5 | EU919818 | 365 | 99.8 | Root;Bacteria;Proteobacteria;Gammaproteobacteria;unclassified_Gammaproteobacteria.                               |
| AF245635 | U70680   | <i>Roseobacter</i> | 99.3 | EU799989 | 59  | 99.6 | Root;Bacteria;Proteobacteria;Alphaproteobacteria;Rhodobacterales;Rhodobacteraceae;Thalassobacter.                |
| AF245634 | U37762   | <i>Roseobacter</i> | 97.3 | FJ545602 | 340 | 99.7 | Root;Bacteria;Proteobacteria;Alphaproteobacteria;Rhodobacterales;Rhodobacteraceae;unclassified_Rhodobacteraceae. |
| AF245633 | AF001651 | SAR86              | 100  | EU799743 | 564 | 98.9 | Root;Bacteria;Proteobacteria;Gammaproteobacteria;unclassified_Gammaproteobacteria.                               |
| AF245632 | AF007259 | <i>Roseobacter</i> | 99.8 | EU819141 | 61  | 99.9 | Root;Bacteria;Proteobacteria;Alphaproteobacteria;Rhodobacterales;Rhodobacteraceae;unclassified_Rhodobacteraceae. |
| AF245631 | U37762   | <i>Roseobacter</i> | 96.8 | FJ545602 | 341 | 100  | Root;Bacteria;Proteobacteria;Alphaproteobacteria;Rhodobacterales;Rhodobacteraceae;unclassified_Rhodobacteraceae. |
| AF245630 | AF098495 | <i>Roseobacter</i> | 96.1 | EU805016 | 61  | 99.9 | Root;Bacteria;Proteobacteria;Alphaproteobacteria;Rhodobacterales;Rhodobacteraceae;unclassified_Rhodobacteraceae. |
| AF245629 | AF001650 | SAR86              | 99.5 | FJ545592 | 366 | 99.1 | Root;Bacteria;Proteobacteria;Gammaproteobacteria;unclassified_Gammaproteobacteria.                               |
| AF245628 | AF007259 | <i>Roseobacter</i> | 93.4 | EU799430 | 60  | 99.9 | Root;Bacteria;Proteobacteria;Alphaproteobacteria;Rhodobacterales;Rhodobacteraceae;unclassified_Rhodobacteraceae. |

|          |          |                          |      |          |     |      |                                                                                                                  |
|----------|----------|--------------------------|------|----------|-----|------|------------------------------------------------------------------------------------------------------------------|
| AF245627 | U70693   | $\gamma$ -Proteobacteria | 85.4 | FJ825908 | 579 | 99.7 | Root;Bacteria;Proteobacteria;Gammaproteobacteria;Oceanospirillales;unclassified_Oceanospirillales.               |
| AF245626 | U78944   | $\alpha$ -Proteobacteria | 98.2 | FJ826374 | 343 | 99.6 | Root;Bacteria;Proteobacteria;Alphaproteobacteria;Rhizobiales;unclassified_Rhizobiales.                           |
| AF245625 | U37762   | <i>Roseobacter</i>       | 96.6 | EU799470 | 59  | 98.8 | Root;Bacteria;Proteobacteria;Alphaproteobacteria;Rhodobacterales;Rhodobacteraceae;unclassified_Rhodobacteraceae. |
| AF245624 | U70687   | SAR11                    | 100  | FJ825912 | 901 | 100  | Root;Bacteria;Proteobacteria;unclassified_Proteobacteria.                                                        |
| AF245623 | AF141447 | $\alpha$ -Proteobacteria | 95.8 | EU394547 | 82  | 94.7 | Root;Bacteria;Proteobacteria;Alphaproteobacteria;unclassified_Alphaproteobacteria.                               |
| AF245622 | AF001650 | SAR86                    | 100  | DQ395550 | 366 | 100  | Root;Bacteria;Proteobacteria;Gammaproteobacteria;unclassified_Gammaproteobacteria.                               |
| AF245621 | U37762   | <i>Roseobacter</i>       | 97   | FM958453 | 341 | 99.5 | Root;Bacteria;Proteobacteria;Alphaproteobacteria;Rhodobacterales;Rhodobacteraceae;unclassified_Rhodobacteraceae. |
| AF245620 | U70684   | SAR11                    | 100  | EU804903 | 907 | 98.9 | Root;Bacteria;Proteobacteria;Alphaproteobacteria;unclassified_Alphaproteobacteria.                               |
| AF245619 | U78944   | $\alpha$ -Proteobacteria | 99.7 | EU799979 | 526 | 99.7 | Root;Bacteria;Proteobacteria;Alphaproteobacteria;unclassified_Alphaproteobacteria.                               |
| AF245618 | AF141574 | Cyanobacteria            | 100  | AJ289785 | 667 | 99.7 | Root;Bacteria;Cyanobacteria;Cyanobacteria;Family II;GpIIa.                                                       |
| AF245617 | U70680   | <i>Roseobacter</i>       | 100  | FJ826118 | 60  | 99.8 | Root;Bacteria;Proteobacteria;Alphaproteobacteria;Rhodobacterales;Rhodobacteraceae;Thalassobacter.                |

|          |          |                    |      |          |    |      |                                                                                                                  |
|----------|----------|--------------------|------|----------|----|------|------------------------------------------------------------------------------------------------------------------|
| AF245615 | AF007259 | <i>Roseobacter</i> | 94.8 | DQ395864 | 61 | 97.9 | Root;Bacteria;Proteobacteria;Alphaproteobacteria;Rhodobacterales;Rhodobacteraceae;unclassified_Rhodobacteraceae. |
| AF245614 | AF098495 | <i>Roseobacter</i> | 95.9 | EU805243 | 61 | 99.7 | Root;Bacteria;Proteobacteria;Alphaproteobacteria;Rhodobacterales;Rhodobacteraceae;unclassified_Rhodobacteraceae. |

**Supplementary Table S2.** Comparison between the phylogenetic affiliations described in Pinhassi et al. (2005) and the predictions obtained by T-RFPred. eFL: predicted fragment length (bp).

| Pinhassi et al. 2005   |                              |                          |              | T-RFPred prediction          |      |              |                                                                                                                  |
|------------------------|------------------------------|--------------------------|--------------|------------------------------|------|--------------|------------------------------------------------------------------------------------------------------------------|
| Clone accession number | Closest hit accession number | Group                    | Identity (%) | Closest hit accession number | eFL  | Identity (%) | RDP Taxonomy                                                                                                     |
| AY904518               | AY386339                     | $\gamma$ -Proteobacteria | 93.4         | EF379800                     | 355  | 94.2         | Root;Bacteria;Proteobacteria;Gammaproteobacteria;unclassified_Gammaproteobacteria.                               |
| AY904517               | Z88589                       | $\gamma$ -Proteobacteria | 99.1         | FJ745164                     | 367  | 98.7         | Root;Bacteria;Proteobacteria;Gammaproteobacteria;unclassified_Gammaproteobacteria.                               |
| AY904516               | AJ627987                     | $\alpha$ -Proteobacteria | 90.6         | FJ745066                     | 62   | 98.0         | Root;Bacteria;Proteobacteria;Alphaproteobacteria;unclassified_Alphaproteobacteria.                               |
| AY904515               | AF141586                     | $\gamma$ -Proteobacteria | 96.4         | EU919816                     | 61   | 97.6         | Root;Bacteria;Proteobacteria;Gammaproteobacteria;unclassified_Gammaproteobacteria.                               |
| AY904514               | AY568820                     | $\gamma$ -Proteobacteria | 93.7         | FJ545459                     | 206  | 94.6         | Root;Bacteria;Proteobacteria;Gammaproteobacteria;Alteromonadales;Incertae sedis 7;unclassified_Incertae sedis 7. |
| AY904513               | AY580445                     | $\alpha$ -Proteobacteria | 99.6         | FJ745263                     | 61   | 99.9         | Root;Bacteria;Proteobacteria;Alphaproteobacteria;Rhodobacterales;Rhodobacteraceae;Roseovarius.                   |
| AY904512               | AY033298                     | $\alpha$ -Proteobacteria | 99.1         | EU804360                     | 82   | 99.5         | Root;Bacteria;Proteobacteria;Alphaproteobacteria;unclassified_Alphaproteobacteria.                               |
| AY904511               | AY580433                     | Planctomycetes           | 93.2         | EU617889                     | 1439 | 93.6         | Root;Bacteria;Planctomycetes;Planctomycetacia;Planctomycetales;Planctomycetaceae;unclassified_Planctomycetaceae. |



|          |          |                          |      |          |     |      |                                                                                                                  |
|----------|----------|--------------------------|------|----------|-----|------|------------------------------------------------------------------------------------------------------------------|
| AY904510 | AY172836 | Cyanobacteria            | 99.5 | FM995188 | 670 | 99.5 | Root;Bacteria;Cyanobacteria;Cyanobacteria;Family II;GpIIa.                                                       |
| AY904509 | Z88582   | $\alpha$ -Proteobacteria | 99.6 | FJ745263 | 61  | 99.6 | Root;Bacteria;Proteobacteria;Alphaproteobacteria;Rhodobacterales;Rhodobacteraceae;Roseovarius.                   |
| AY904508 | AY038531 | $\alpha$ -Proteobacteria | 97.1 | FJ203089 | 61  | 99.7 | Root;Bacteria;Proteobacteria;Alphaproteobacteria;Rhodobacterales;Rhodobacteraceae;unclassified_Rhodobacteraceae. |
| AY904507 | AY344412 | Planctomycetes           | 88.2 | EF575129 | 61  | 99.8 | Root;Bacteria;Planctomycetes;Planctomycetacia;Planctomycetales;Planctomycetaceae;unclassified_Planctomycetaceae. |
| AY904506 | AF473915 | $\alpha$ -Proteobacteria | 97.9 | FJ202463 | 61  | 97.4 | Root;Bacteria;Proteobacteria;Alphaproteobacteria;Rhodobacterales;Rhodobacteraceae;Shimia.                        |
| AY904505 | AY038415 | Unknown                  | 89.3 | FJ425635 | 91  | 93.6 | Root;Bacteria;Proteobacteria;unclassified_Proteobacteria.                                                        |
| AY904504 | AY580815 | Unknown                  | 96.5 | FM165252 | 203 | 89.5 | Root;Bacteria;Proteobacteria;Alphaproteobacteria;Rhizobiales;unclassified_Rhizobiales.                           |
| AY904503 | AY136124 | $\alpha$ -Proteobacteria | 98.7 | FJ403092 | 61  | 99.2 | Root;Bacteria;Proteobacteria;Alphaproteobacteria;Rhodobacterales;Rhodobacteraceae;Thalassobius.                  |
| AY904502 | AY345413 | $\alpha$ -Proteobacteria | 96.8 | FJ202229 | 61  | 98.0 | Root;Bacteria;Proteobacteria;Alphaproteobacteria;Rhodobacterales;Rhodobacteraceae;unclassified_Rhodobacteraceae. |
| AY904501 | AY125371 | Cyanobacteria            | 99.4 | FJ937843 | 669 | 99.8 | Root;Bacteria;Cyanobacteria;Cyanobacteria;Family II;GpIIa.                                                       |
| AY904500 | Z88589   | $\gamma$ -Proteobacteria | 99.2 | FJ745164 | 367 | 99.0 | Root;Bacteria;Proteobacteria;Gammaproteobacteria;unclassified_Gammaproteobacteria.                               |
| AY904499 | AY697876 | $\alpha$ -Proteobacteria | 100  | FJ825896 | 901 | 100  | Root;Bacteria;Proteobacteria;Alphaproteobacteria;unclassified_Alphaproteobacteria.                               |

|          |          |                          |      |          |     |      |                                                                                                                  |
|----------|----------|--------------------------|------|----------|-----|------|------------------------------------------------------------------------------------------------------------------|
| AY904498 | U13159   | $\alpha$ -Proteobacteria | 99.5 | EU804543 | 907 | 100  | Root;Bacteria;Proteobacteria;Alphaproteobacteria;unclassified_Alphaproteobacteria.                               |
| AY904497 | AY125371 | Cyanobacteria            | 99.6 | FM995188 | 670 | 99.8 | Root;Bacteria;Cyanobacteria;Cyanobacteria;Family II;GpIIa.                                                       |
| AY904496 | Z88579   | $\gamma$ -Proteobacteria | 98.5 | EF575314 | 61  | 99.4 | Root;Bacteria;Proteobacteria;Gammaproteobacteria;Oceanospirillales;Alcanivoraceae;Alcanivorax.                   |
| AY904495 | AJ002565 | $\alpha$ -Proteobacteria | 99.8 | AB294940 | 61  | 95.3 | Root;Bacteria;Proteobacteria;Alphaproteobacteria;Rhodobacterales;Rhodobacteraceae;unclassified_Rhodobacteraceae. |
| AY904494 | AY038571 | $\alpha$ -Proteobacteria | 99.8 | EU805016 | 61  | 99.9 | Root;Bacteria;Proteobacteria;Alphaproteobacteria;Rhodobacterales;Rhodobacteraceae;unclassified_Rhodobacteraceae. |
| AY904493 | AY580483 | $\alpha$ -Proteobacteria | 99.3 | EU804746 | 907 | 99.8 | Root;Bacteria;Proteobacteria;Alphaproteobacteria;unclassified_Alphaproteobacteria.                               |
| AY904492 | AY580474 | $\alpha$ -Proteobacteria | 99.8 | EU804807 | 907 | 100  | Root;Bacteria;Proteobacteria;Alphaproteobacteria;unclassified_Alphaproteobacteria.                               |
| AY904491 | AY033296 | Actinobacteria           | 100  | FJ826502 | 39  | 100  | Root;Bacteria;unclassified_Bacteria.                                                                             |
| AY904490 | AY580445 | $\alpha$ -Proteobacteria | 99.4 | FJ745263 | 61  | 99.8 | Root;Bacteria;Proteobacteria;Alphaproteobacteria;Rhodobacterales;Rhodobacteraceae;Roseovarius.                   |
| AY904489 | AY125371 | Cyanobacteria            | 99.6 | FM995188 | 670 | 99.8 | Root;Bacteria;Cyanobacteria;Cyanobacteria;Family II;GpIIa.                                                       |
| AY904488 | AY499416 | $\alpha$ -Proteobacteria | 99.6 | EU802885 | 907 | 100  | Root;Bacteria;Proteobacteria;Alphaproteobacteria;unclassified_Alphaproteobacteria.                               |
| AY904487 | AY193157 | $\gamma$ -Proteobacteria | 91.8 | FM242293 | 366 | 90.9 | Root;Bacteria;Proteobacteria;Gammaproteobacteria;Oceanospirillales;unclassified_Oceanospirillales.               |

|          |          |                          |      |          |     |      |                                                                                          |
|----------|----------|--------------------------|------|----------|-----|------|------------------------------------------------------------------------------------------|
| AY904486 | AF268220 | $\gamma$ -Proteobacteria | 98.9 | EU394545 | 908 | 99.6 | Root;Bacteria;Proteobacteria;Alphaproteobacteria;Rhizobiales;unclassified_Rhizobiales.   |
| AY904485 | AY033299 | $\alpha$ -Proteobacteria | 97.1 | EU804104 | 907 | 99.4 | Root;Bacteria;Proteobacteria;Alphaproteobacteria;unclassified_Alphaproteobacteria.       |
| AY904484 | AY093481 | $\alpha$ -Proteobacteria | 98.8 | EU805335 | 907 | 99.4 | Root;Bacteria;Proteobacteria;Alphaproteobacteria;unclassified_Alphaproteobacteria.       |
| AY904483 | AY172836 | Cyanobacteria            | 99.2 | FM995188 | 670 | 99.8 | Root;Bacteria;Cyanobacteria;Cyanobacteria;Family II;GpIIa.                               |
| AY904482 | AY172836 | Cyanobacteria            | 99.6 | FM995188 | 670 | 100  | Root;Bacteria;Cyanobacteria;Cyanobacteria;Family II;GpIIa.                               |
| AY904481 | AY664120 | $\delta$ -Proteobacteria | 97.9 | FJ155032 | 91  | 99.0 | Root;Bacteria;Proteobacteria;Deltaproteobacteria;unclassified_Deltaproteobacteria.       |
| AY573531 | U62913   | Bacteroidetes            | 94.4 | EU287248 | 96  | 90.9 | Root;Bacteria;Bacteroidetes;Flavobacteria;Flavobacteriales;Flavobacteriaceae;Algibacter. |

**Supplementary Table S3.** Comparison between the phylogenetic affiliations described in Mou et al. (2005) and the predictions obtained by T-RFPred. eFL: predicted fragment length (bp).

| Mou et al. 2005        |                              |                          |              | T-RFPred prediction          |     |              |                                                                                                                  |
|------------------------|------------------------------|--------------------------|--------------|------------------------------|-----|--------------|------------------------------------------------------------------------------------------------------------------|
| Clone accession number | Closest hit accession number | Group                    | Identity (%) | Closest hit accession number | eFL | Identity (%) | RDP Taxonomy                                                                                                     |
| AY476805               | AF546929                     | $\beta$ -Proteobacteria  | 96           | EU104172                     | 205 | 100          | Root;Bacteria;Proteobacteria;Betaproteobacteria;Burkholderiales;Comamonadaceae;Curvibacter.                      |
| AY476804               | AY609198                     | <i>Rhodoferax</i>        | 97           | EF632894                     | 206 | 99.0         | Root;Bacteria;Proteobacteria;Betaproteobacteria;Burkholderiales;Comamonadaceae;Rhodoferax.                       |
| AY476802               | AY580466                     | <i>Roseobacter</i>       | 99           | FJ203648                     | 61  | 98.4         | Root;Bacteria;Proteobacteria;Alphaproteobacteria;Rhodobacterales;Rhodobacteraceae;unclassified_Rhodobacteraceae. |
| AY476801               | AY580764                     | $\gamma$ -Proteobacteria | 93           | EF379837                     | 231 | 93.0         | Root;Bacteria;Proteobacteria;Gammaproteobacteria;unclassified_Gammaproteobacteria.                               |
| AY476800               | AF477832                     | Bacteroidetes            | 99           | EF471578                     | 97  | 99.3         | Root;Bacteria;Bacteroidetes;Sphingobacteria;Sphingobacteriales;Flexibacteraceae;unclassified_Flexibacteraceae.   |
| AY476799               | AY580722                     | Bacteroidetes            | 99           | EF471578                     | 98  | 99.5         | Root;Bacteria;Bacteroidetes;Sphingobacteria;Sphingobacteriales;Flexibacteraceae;unclassified_Flexibacteraceae.   |
| AY476795               | AJ784130                     | $\gamma$ -Proteobacteria | 94           | FJ154988                     | 370 | 97.2         | Root;Bacteria;Proteobacteria;Gammaproteobacteria;Alteromonadales;Pseudoalteromonadaceae;Pseudoalteromonas.       |
| AY476794               | AJ391181                     | <i>Roseobacter</i>       | 97           | FJ869045                     | 513 | 100          | Root;Bacteria;Proteobacteria;Alphaproteobacteria;Rhodobacterales;Rhodobacteraceae;unclassified_Rhodobacteraceae. |

|          |          |                          |    |          |     |      |                                                                                                                |
|----------|----------|--------------------------|----|----------|-----|------|----------------------------------------------------------------------------------------------------------------|
| AY476785 | AY461670 | $\gamma$ -Proteobacteria | 99 | FJ154989 | 373 | 99.1 | Root;Bacteria;Proteobacteria;Gammaproteobacteria;Alteromonadales;Pseudoalteromonadaceae;Pseudoalteromonas.     |
| AY476784 | AF227238 | $\gamma$ -Proteobacteria | 92 | FJ457244 | 373 | 99.8 | Root;Bacteria;Proteobacteria;Gammaproteobacteria;Alteromonadales;Pseudoalteromonadaceae;Pseudoalteromonas.     |
| AY476781 | AY461670 | $\gamma$ -Proteobacteria | 98 | FJ876419 | 373 | 98.1 | Root;Bacteria;Proteobacteria;Gammaproteobacteria;Alteromonadales;Pseudoalteromonadaceae;Pseudoalteromonas.     |
| AY476780 | AY461670 | $\gamma$ -Proteobacteria | 99 | FJ876419 | 371 | 99.1 | Root;Bacteria;Proteobacteria;Gammaproteobacteria;Alteromonadales;Pseudoalteromonadaceae;Pseudoalteromonas.     |
| AY476779 | AY580722 | Bacteroidetes            | 99 | EF471578 | 97  | 99.4 | Root;Bacteria;Bacteroidetes;Sphingobacteria;Sphingobacteriales;Flexibacteraceae;unclassified_Flexibacteraceae. |
| AY476778 | AY580367 | $\gamma$ -Proteobacteria | 95 | EU487984 | 324 | 98.1 | Root;Bacteria;Proteobacteria;Gammaproteobacteria;Alteromonadales;Colwelliaceae;Thalassomonas.                  |
| AY476776 | AY461670 | $\gamma$ -Proteobacteria | 99 | FJ876419 | 372 | 99.1 | Root;Bacteria;Proteobacteria;Gammaproteobacteria;Alteromonadales;Pseudoalteromonadaceae;Pseudoalteromonas.     |
| AY476775 | AY580722 | Bacteroidetes            | 99 | EF471578 | 97  | 99.4 | Root;Bacteria;Bacteroidetes;Sphingobacteria;Sphingobacteriales;Flexibacteraceae;unclassified_Flexibacteraceae. |
| AY476774 | Z88582   | <i>Roseobacter</i>       | 98 | FJ745263 | 61  | 99.3 | Root;Bacteria;Proteobacteria;Alphaproteobacteria;Rhodobacterales;Rhodobacteraceae;Roseovarius.                 |
| AY476771 | AY580445 | <i>Roseobacter</i>       | 99 | FJ745263 | 61  | 100  | Root;Bacteria;Proteobacteria;Alphaproteobacteria;Rhodobacterales;Rhodobacteraceae;Roseovarius.                 |
| AY476770 | AY580445 | <i>Roseobacter</i>       | 99 | FJ745263 | 61  | 98.8 | Root;Bacteria;Proteobacteria;Alphaproteobacteria;Rhodobacterales;Rhodobacteraceae;Roseovarius.                 |
| AY476769 | Z88582   | <i>Roseobacter</i>       | 99 | FJ745263 | 61  | 99.3 | Root;Bacteria;Proteobacteria;Alphaproteobacteria;Rhodobacterales;Rhodobacteraceae;Roseovarius.                 |

|          |          |                          |     |          |     |      |                                                                                                             |
|----------|----------|--------------------------|-----|----------|-----|------|-------------------------------------------------------------------------------------------------------------|
| AY476767 | AY461670 | $\gamma$ -Proteobacteria | 99  | FJ154989 | 372 | 99.1 | Root;Bacteria;Proteobacteria;Gammaproteobacteria;Alteromonadales;Pseudoalteromonadaceae;Pseudoalteromonas.  |
| AY476763 | Z88582   | <i>Roseobacter</i>       | 99  | FJ745263 | 61  | 99.5 | Root;Bacteria;Proteobacteria;Alphaproteobacteria;Rhodobacterales;Rhodobacteraceae;Roseovarius.              |
| AY476751 | AY033296 | Actinobacteria           | 96  | EU800288 | 39  | 99.2 | Root;Bacteria;unclassified_Bacteria.                                                                        |
| AY476750 | AF546929 | $\beta$ -Proteobacteria  | 95  | EU104172 | 206 | 99.8 | Root;Bacteria;Proteobacteria;Betaproteobacteria;Burkholderiales;Comamonadaceae;Curvibacter.                 |
| AY476741 | AY345438 | <i>Roseobacter</i>       | 98  | EF574092 | 341 | 99.1 | Root;Bacteria;Proteobacteria;Alphaproteobacteria;Rhodobacterales;Rhodobacteraceae;Loktanella.               |
| AY476740 | AY159887 | <i>Sulfitobacter</i>     | 99  | FJ826092 | 60  | 99.6 | Root;Bacteria;Proteobacteria;Alphaproteobacteria;Rhodobacterales;Rhodobacteraceae;Sulfitobacter.            |
| AY476739 | AY580445 | <i>Roseobacter</i>       | 100 | FJ745263 | 61  | 100  | Root;Bacteria;Proteobacteria;Alphaproteobacteria;Rhodobacterales;Rhodobacteraceae;Roseovarius.              |
| AY476738 | AF053734 | $\gamma$ -Proteobacteria | 93  | EF379837 | 213 | 96.6 | Root;Bacteria;Proteobacteria;Gammaproteobacteria;unclassified_Gammaproteobacteria.                          |
| AF547425 | AF468380 | <i>Sulfitobacter</i>     | 97  | FJ826092 | 58  | 98.9 | Root;Bacteria;Proteobacteria;Alphaproteobacteria;Rhodobacterales;Rhodobacteraceae;Sulfitobacter.            |
| AF547424 | AF468380 | <i>Sulfitobacter</i>     | 97  | FJ826092 | 61  | 96.9 | Root;Bacteria;Proteobacteria;Alphaproteobacteria;Rhodobacterales;Rhodobacteraceae;Sulfitobacter.            |
| AF547422 | AY580666 | Bacteroidetes            | 96  | FJ745252 | 94  | 96.3 | Root;Bacteria;Bacteroidetes;Flavobacteria;Flavobacteriales;Cryomorphaceae;unclassified_Cryomorphaceae.      |
| AF547421 | AB113609 | $\beta$ -Proteobacteria  | 93  | DQ450189 | 208 | 94.4 | Root;Bacteria;Proteobacteria;Betaproteobacteria;Burkholderiales;Comamonadaceae;unclassified_Comamonadaceae. |

|          |          |                          |    |          |     |      |                                                                                                                  |
|----------|----------|--------------------------|----|----------|-----|------|------------------------------------------------------------------------------------------------------------------|
| AF547415 | AY345438 | <i>Roseobacter</i>       | 99 | EF574092 | 341 | 99.8 | Root;Bacteria;Proteobacteria;Alphaproteobacteria;Rhodobacterales;Rhodobacteraceae;Loktanella.                    |
| AF547414 | AJ459874 | $\alpha$ -Proteobacteria | 95 | DQ493433 | 330 | 99.2 | Root;Bacteria;Proteobacteria;Alphaproteobacteria;Caulobacterales;Caulobacteraceae;unclassified_Caulobacteraceae. |
| AF547413 | AY424898 | <i>Oceanicola</i>        | 97 | FJ869046 | 341 | 99.8 | Root;Bacteria;Proteobacteria;Alphaproteobacteria;Rhodobacterales;Rhodobacteraceae;unclassified_Rhodobacteraceae. |
| AF547409 | AY580664 | Bacteroidetes            | 94 | FJ745252 | 97  | 95.6 | Root;Bacteria;Bacteroidetes;Flavobacteria;Flavobacteriales;Cryomorphaceae;unclassified_Cryomorphaceae.           |
| AF547408 | AY580726 | Bacteroidetes            | 92 | AM279196 | 101 | 93.1 | Root;Bacteria;Bacteroidetes;unclassified_Bacteroidetes.                                                          |
| AF547407 | AY345438 | <i>Roseobacter</i>       | 98 | EF574092 | 341 | 99.3 | Root;Bacteria;Proteobacteria;Alphaproteobacteria;Rhodobacterales;Rhodobacteraceae;Loktanella.                    |
| AF547406 | AY038571 | <i>Roseobacter</i>       | 97 | DQ234154 | 61  | 99.5 | Root;Bacteria;Proteobacteria;Alphaproteobacteria;Rhodobacterales;Rhodobacteraceae;unclassified_Rhodobacteraceae. |
| AF547405 | AB114422 | <i>Roseobacter</i>       | 97 | AB114422 | 341 | 97.8 | Root;Bacteria;Proteobacteria;Alphaproteobacteria;Rhodobacterales;Rhodobacteraceae;Roseovarius.                   |
| AF547399 | AY580445 | <i>Roseobacter</i>       | 99 | FJ745263 | 61  | 98.9 | Root;Bacteria;Proteobacteria;Alphaproteobacteria;Rhodobacterales;Rhodobacteraceae;Roseovarius.                   |

## References

- González JM, Simó R, Massana R, Covert JS, Casamayor EO, Pedrós-Alió C, Moran MA: **Bacterial community structure associated with a dimethylsulfoniopropionate-producing North Atlantic algal bloom.** *Appl Environ Microbiol* 2000, **66**:4237-4246.
- Hagström Å, Pommier T, Rohwer F, Simu K, Stolte W, Svensson D, Zweifel UL: **Use of 16S ribosomal DNA for delineation of marine bacterioplankton species.** *Appl Environ Microbiol* 2002, **68**:3628-3633.
- Mou X, Moran MA, Stepanauskas R, González JM, Hodson RE: **Flow-cytometric cell sorting and subsequent molecular analyses for culture-independent identification of bacterioplankton involved in dimethylsulfoniopropionate transformations.** *Appl Environ Microbiol* 2005, **71**:1405-1416.
- Pinhassi J, Simó R, González JM, Vila M, Alonso-Sáez L, Kiene RP, Moran MA, Pedrós-Alió C: **Dimethylsulfoniopropionate turnover is linked to the composition and dynamics of the bacterioplankton assemblage during a microcosm phytoplankton bloom.** *Appl Environ Microbiol* 2005, **71**:7650-7660.
- Rusch DB, Halpern AL, Sutton G, Heidelberg KB, Williamson S, Yooseph S, Wu D, Eisen JA, Hoffman JM, Remington K, Beeson K, Tran B, Smith H, Baden-Tillson H, Stewart C, Thorpe J, Freeman J, Andrews-Pfannkoch C, Venter JE, Li K, Kravitz S, Heidelberg JF, Utterback T, Rogers YH, Falcón LI, Souza V, Bonilla-Rosso G, Eguiarte LE, Karl DM, Sathyendranath S, Platt T, Bermingham E, Gallardo V, Tamayo-Castillo G, Ferrari MR, Strausberg RL, Nealson K, Friedman R, Frazier M, Venter JC: **The Sorcerer II Global Ocean Sampling expedition: northwest Atlantic through eastern tropical Pacific.** *PLoS Biol* 2007, **5**:398-431.
- Wang Q, Garrity GM, Tiedje JM, Cole JR: **Naïve Bayesian classifier for rapid assignment of rRNA sequences into the new bacterial taxonomy.** *Appl Environ Microbiol* 2007, **73**:5261-5267.
- Yarza P, Richter M, Peplies J, Euzéby J, Amann R, Schleifer K-H, Ludwig W, Glöckner FO, Rosselló-Mora R: **The all-species living tree project: a 16S rRNA-based phylogenetic tree of all sequenced type strains.** *Syst Appl Microbiol* 2008, **31**:241-250.
